# Supplementary material for: Distribution, evolution and expression of GATA-TFs provide new insights into their functions in light response and fruiting body development of Tolypocladium guangdongense
Source: PeerJ. 2020 Aug 28;8:e9784. doi: 10.7717/peerj.9784 (PMC7457929; doi:10.7717/peerj.9784)
Supplement: Table S1 [file peerj-08-9784-s001.xlsx]

## Sheet: Sheet1
Supplementary Table 1 Primers used in this study for qPCR analyses.
Gene ID	Primer name	Sequence	size	Efficiency (%)	R2
CCG_01872	Forward	GCGTGACCCAGACCAGTT	200 bp	108.5	0.982
	Reverse	GACATCGCAGACGACAAAA
CCG_04254	Forward	CGGTCTGCTGGACTCGTTC	162 bp	110.5	0.992
	Reverse	GCCTCCGTGGATGGTGTTA
CCG_07987	Forward	GGGGTGACCACCACCGACTA	186 bp	102.2	0.979
	Reverse	CGGCAGCGACTGAGCAAT
CCG_02574	Forward	ATCTTCACAACTAAGGGCAACC	159 bp	105.8	0.999
	Reverse	CACAGGACGGAGCCAAACT
CCG_07433	Forward	CCTCAAGAAACCGCCTCAT	191 bp	96.0	0.984
	Reverse	TGCAGCCTTCAGCACCTC
CCG_06499	Forward	CTGCGACCGCGAAGCCTCAT	154 bp	99.7	0.99
	Reverse	TGGCGTTCGTGGCGTGATG
CCG_00651	Forward	GAGAAGGCGTCCCTGTGCT	161 bp	102.5	0.995
	Reverse	GCGGCATCGTCTGTTGAG
