# Supplementary material for: Distribution, evolution and expression of GATA-TFs provide new insights into their functions in light response and fruiting body development of Tolypocladium guangdongense
Source: PeerJ. 2020 Aug 28;8:e9784. doi: 10.7717/peerj.9784 (PMC7457929; doi:10.7717/peerj.9784)
Supplement: Table S2 [file peerj-08-9784-s002.xlsx]

## Sheet: Sheet1
Supplementary Table 2 Amino acid sequences and chromosome positions of TgGATAs.
Name	gene ID	locus	Genomic sequence	amino acid sequence
TgGATA1	CCG_01872	chromosome 1	8293919-8297086	MEGFYTHPQLSPQELQRPQQQGGQQQQQQQQQQQQQHQQQQQQQQQQQPLPNAVNMSTQPSLQPQPAISQVMPDHAMMGGDSLDDIIRNNQDEMHRRRSMPHAYANPESQAHNTRRLSSIGTGDMMSFGAGNAGLGNYHFNQPMAPGLPNINTNLNMAGQMGNYMADPAEYSAISTDLMGSMIPASFANMDMGPMVNDTSAIGMFPATGAPGSTFSPGQMASVGADFPMGVNSEDGPLRAAPTNAPAVIRAMDDGRDDDMMTVKATQFGSMGSAQNPPANSMNLDPNVGTFSQNMPPPPSRHVSSTGSGISSQPGTSASVTQTSSAADATTPVPAPTPREPKEKTIYSKSGFDMLKALWLVATRKDPKIHLGAVDMSCAFVVCDVTMNDCPIVYVSDNF…
TgGATA2	CCG_04254	chromosome 2	6652610-6655450	MLLLRVVVGKIKNMERQSIFQRIPLGPDVPGWNCIGWAEEALETALRDGQALGTSVRRPRRPRGTATMSHGQPNFFGFSNLDLDEQDGNDIMSFLDHNMLGPFDDVAMALDPGVDGTAPQAFNPNADNVNDARLPGSDGPTEESIARAESQFNTAANNVPGAGPLPPGSFAQLSLSGGSTLTEFTKRRNWPAKVVEELKDFLHILDANGRIKYASPSVLSVAGYTAEEILDVFLKELIHPDDQGVFVSELNESIASGAPLRMFYRFKKKDGMYAIFEAVGHAHIAGAKFAPNPSNQSPFCQAVFMMARPYPTKNAGLLDSFLEHKIENERLRRRIAELRREEEAEADEAQRQWAQSQEGRSDVTPSTEAGASSSAPFFQSGSMANDGTMSQSDRDALNI…
TgGATA3	CCG_07987	chromosome 4	2526927-2530178	MPASTATPAATSRPVGAMDPTTTEHDFRFPRRPDARSRGGHHHHHHHHRDDGHDRDHVRGRSNGDVLVAKGGLNRAHGAAASAAASVHDDLLGPALFPALRSAGPDAAQTVDQMQDDDPLATQVWKFFKATKQQLPNQQRMENLTWRMMALNMRRQKHEEELQRRSQLHQSRTDSRPFLAPRRLANQAAQNTPSGIAQLRKTSENHAAAAEPMNLDDFIFADKAGTPAFMSPPPLPSKPMDDASASAAAAAAIPIGKSRRDSASHFVPQSVPHHQRPQNDEFNYVARRHRKTSIDERRNRKRPANFSPHVSAVNSSAAGGAHNLESDTDLQGYSLDNTNQAAMHQQLPSGNPAVPFHLDTFMDGDPVMSSAAHFQQNFSFSPSTSPMIPNGPFSTVYNN…
TgGATA4	CCG_02574	chromosome 1	2419328-2421148	MEDGPQMFPLHSMDPISRPSSTSTSASAMLPGIAALAASNAALESSQLRATAPLQAPMNTGVSHAATSGGGNLPTCQNCTTSTTPLWRRDEFGSVLCNACGLFLKLHGRPRPISLKTDVIKSRNRVKTMRPDLAPKKKQQQQQQQVDSFPFLTDANGAEMSAQNAAAAAAAQAIRTAQKSANGNNEGADSPISRTGTPSMYNQGIPSFMVDDPYQTSFNGGPGADGSAGSPMNGDRGLDSPQTHEQIMAHNSSLKTRVSELEVINELFRGRLSQLEQQEAAARRGQEVAGVEQTQLRSQLAATQESEAQLRLQLEDSHRRENNLKRRLDELELEMKEAKETMESDRPSKKPRMDQDEDFAVAAEEQDAASTPPSTA
TgGATA5	CCG_07433	chromosome 4	478687-480406	MSSRSRDDAIESSIQVSTGTSVHKDSRAPGRSDGSASPNSKDSPVNDGAGSSRGPSPASTAGEGSVKASTSQGGQVCSNCGTTRTPLWRRSPQGATICNACGLYLKARNTSRPTSLKKPPHVVSTGPPRPSLSRTSSALAPKLAPNTAGATYVSAEQTPTGTCPGGGRCNGTGGAEGCSGCPAFNNRVSKSAQLSVMQRQKSSSGRAEPSNGPTPIDVNALRAQNQDNTVVIACQNCGTTITPLWRRDESGHTICNACGLYYKLHGVHRPVTMKKATIKRRKRVIPASHEEEQDESAESVDAVSQEKTPERGTENDDGSINLGMRRRPDQPLTIEPEPVMRCSGQDSPLPSASASDLAAYHQSSGYVRNMPNSLNDDNRLPPMTSMAAGMSERQSSLSP…
TgGATA6	CCG_06499	chromosome 3	1574369-1575081	MSIASLSPNQREAGSSPRRDSPSADADASGRSRRQPPSTFGSRRLQPGDGLGFQMIRREADDAGFPLFISRSPNPRAAPPPQPATAKPHGKPDAAVASTATSTARPPHHAPVAANRHGVRQVSRNKQSSRHERQHHHPHKADPPRKQGTGNARLECDACGTSETPEWRCGPDGLGTLCNVCGLVLAKKQRRRSGV
TgGATA7	CCG_00651	chromosome 1	4870205-4871593	MSEAVRGVHSAGSYQQFICRHCGTSDTSLWRKDTHDRLLCNACGHYLQRIGGVRAIFAINAPSGTATSRHSDATFNLLEGIHSVYWASLQHAHGPASELPSWLELLQHPDDSKRVAALSKLSHCLVYQGSRWEASPRAVPFLLKLLDDVRTSYRHDIIQLLIRLAVGDAGDWRPVITNIKSRRGRAGQTNWALQSYDAVREGVPVLKTLLFEDPVPIIPANCAYALAWFPEAARANAQDTLASIWDLLNRRCRYPFAMATAVLAFGQLTAGITNLDSSDGQPHVHDPEAISRLLGLHRQVRIISMVRWAAAKALLDLDVEDSEAILTVTKATIETGPGWENIIPCGNDICGCSVATLYGFGHRKTNDEASSSAVEAVVDALSGSYGKVACIIADVAMNM…
