# Supplementary material for: Distribution, evolution and expression of GATA-TFs provide new insights into their functions in light response and fruiting body development of Tolypocladium guangdongense
Source: PeerJ. 2020 Aug 28;8:e9784. doi: 10.7717/peerj.9784 (PMC7457929; doi:10.7717/peerj.9784)
Supplement: Table S3 [file peerj-08-9784-s003.xlsx]

## Sheet: Sheet1
Supplementary Table 3 Detail information of homologous proteins of TgGATAs.
Species	GATA1	GATA2	GATA3	GATA4	GATA5	GATA6	GATA7
Tolypocladium guangdongense	CCG_01872	CCG_04254	CCG_07987	CCG_02574	CCG_07433	CCG_06499	CCG_00651
Acremonium chrysogenum	KFH45704	KFH41821	KFH43294	KFH40410	KFH48792	/	/
Aspergillus flavus	XP_002384232	XP_002383295	XP_002383114	XP_002379623	XP_002379258	XP_002376041	XP_002375814
Aspergillus fumigatus	XP_755026	XP_751563	XP_755671	XP_752212	XP_753523	XP_754237	XP_747880
Aspergillus nidulans	XP_661040	XP_661039	X52491	AAG49352	XP_657780	AAB16914	/
Aspergillus niger	XP_001395039	XP_001389246	XP_001395948	XP_001399365	XP_001388675	XP_001393681	/
Aspergillus terreus	XP_001217545	XP_001212330	XP_001209950	XP_001208677	XP_001216335	/
Botrytis cinerea	XP_024547291	XP_001559684	XP_001551685	XP_001545710	XP_001546599	XP_024553024	/
Chaetomium globosum	XP_001219613	XP_001221143	XP_001222574	XP_001223035	/	/	/
Colletotrichum graminicola	XP_008094502	XP_008089612	XP_008090737	XP_008091631	XP_008091732	/	/
Coprinopsis cinerea	XP_001832659	/	/	XP_002911612	XP_001831801	XP_001836180	/
Cordyceps militaris	XP_006666400	XP_006665295	XP_006668813	XP_006669921	XP_006669356	/	/
Cryptococcus neoformans	AAT73612	P0CR14	XP_012046597	XP_012051928	XP_012052259	/	/
Fusarium fujikuroi	XP_023429557	XP_023424953	XP_023432271	XP_023425875	XP_023426432	KLP21085	XP_023436426
Fusarium oxysporum	RKK86314	XP_018233539	XP_018237085	XP_018237089	XP_018242016	/	/
Glarea lozoyensis ATCC 20868	XP_008076716	XP_008080437	XP_008086862	XP_008082487	XP_008088606	/	/
Histoplasma capsulatum NAm1	XP_001541402	/	XP_001539564	XP_001538368	/	/	/
Leptosphaeria maculans JN3	XP_003841512	XP_003841210	XP_003836396	/	XP_003837137	/	/
Magnaporthe oryzae	XP_003716379	XP_003713571	XP_003720998	XP_003711901	XP_003714860	/	/
Marssonina brunnea f. sp. 'multigermtubi' MB_m1	XP_007297288	XP_007291750	XP_007295092	XP_007290841	XP_007289914	/	/
Neurospora crassa	XP_011395153	XP_963819	XP_963796	XP_011394349	XP_961978	ESA42507	/
Ophiocordyceps sinensis	EQK98623	EQK98372	EQK99347	/	EQK99369	/	/
Penicillium chrysogenum	KZN86857	KZN86039	KZN90283	KZN85338	KZN88332	/	/
Penicillium marneffei ATCC 18224	XP_002152666	XP_002151162	XP_002148896	XP_002145253	XP_002144994	XP_002143516	/
Pleurotus ostreatus PC15	KDQ32172	/	/	KDQ27596.	/	/	KDQ23833
Pseudogymnoascus destructans	XP_024319857	XP_024321385	XP_024328289	XP_024326804	XP_024321711	/	/
Rhynchosporium commune	CZT01296	CZT04475	CZT12344	CZT10209	CZS99953	/	/
Saccharomyces cerevisiae	/	/	/	NP_012425	/	/	/
Sclerotinia sclerotiorum 1980 UF-70	XP_001586924	XP_001587208	XP_001593613	XP_001589151	XP_001590783	ANQ80447	/
Talaromyces stipitatus ATCC 10500	XP_002486372	XP_002341878	XP_002485294	XP_002487304	XP_002340383	/	/
Tolypocladium ophioglossoides CBS 100239	KND90894	KND91220		KND88796	KND87860	/	/
Tolypocladium paradoxum	POR35108	POR34486	POR38421	POR36303	POR39347	POR32014	POR34110
Trichoderma atroviride	AAU14171	XP_013938453	XP_013941064	XP_013941453	XP_013941678	/	/
Trichoderma reesei	XP_006965752	XP_006966680	XP_006964161	XP_006962136	XP_006965903	/	/
Tuber borchii	PUU76985	PUU74107	PUU77539	PUU82007	PUU77496	/	/
Tuber melanosporum Mel28	XP_002839553	XP_002835855	XP_002836367	XP_002836042	XP_002841917	/	/
Ustilago maydis	XP_011389633	XP_011389049	XP_011390769		XP_011387018	/	XP_011390179
Yarrowia lipolytica CLIB122	XP_500260	/	XP_503074	XP_502148	XP_503590	/	/
Zymoseptoria tritici	XP_003848281	XP_003857660	XP_003852092	XP_003848754	XP_003849601	/	/
Ustilaginoidea virens	KDB16534	KDB17355	KDB13259	KDB13259	KDB13173	/	/
