# Supplementary material for: Distribution, evolution and expression of GATA-TFs provide new insights into their functions in light response and fruiting body development of Tolypocladium guangdongense
Source: PeerJ. 2020 Aug 28;8:e9784. doi: 10.7717/peerj.9784 (PMC7457929; doi:10.7717/peerj.9784)
Supplement: Table S4 [file peerj-08-9784-s004.xlsx]

## Sheet: Sheet1
Supplementary Table 4 Intron-exon structures in TgGATAs.
Scaffold	gene	type	start	end	length	strand	number of cds	number of intron
Scaffold1	CCG_00651	mRNA	4870205	4871593	1389	+	1	0
		CDS	4870205	4871593	1389	+
Scaffold1	CCG_01872	mRNA	8293919	8297086	3168	-	2	1
		CDS	8293919	8294206	288	-
		intron	8294207	8294269	63	-
		CDS	8294270	8297086	2817	-
Scaffold1	CCG_02574	mRNA	2419328	2421148	1821	+	4	3
		CDS	2419328	2419473	146	+
		intron	2419474	2419667	194	+
		CDS	2419666	2419738	73	+
		intron	2419739	2420177	439	+
		CDS	2420178	2420372	195	+
		intron	2420373	2420431	59	+
		CDS	2420432	2421148	717	+
Scaffold2	CCG_04254	mRNA	6652610	6655450	2841	+	3	2
		CDS	6652610	6652779	170	+
		intron	6652780	6653936	1157	+
		CDS	6653937	6655252	1316	+
		intron	6655253	6655310	58	+
		CDS	6655311	6655450	140	+
Scaffold3	CCG_06499	mRNA	1574369	1575081	713	-	3	2
		CDS	1574369	1574515	147	-
		intron	1574516	1574575	60	-
		CDS	1574576	1574851	276	-
		intron	1574852	1574916	65	-
		CDS	1574917	1575081	165	-
Scaffold4	CCG_07433	mRNA	478687	480406	1720	+	3	2
		CDS	478687	478919	233	+
		intron	478920	478979	60	+
		CDS	478980	479521	542	+
		intron	479522	479573	52	+
		CDS	479574	480406	833	+
Scaffold4	CCG_07987	mRNA	2526927	2530178	3252	+	3	2
		CDS	2526927	2527441	515	+
		intron	2527442	2527515	74	+
		CDS	2527516	2527894	379	+
		intron	2527895	2528132	238	+
		CDS	2528133	2530178	2046	+
