# Supplementary material for: Distribution, evolution and expression of GATA-TFs provide new insights into their functions in light response and fruiting body development of Tolypocladium guangdongense
Source: PeerJ. 2020 Aug 28;8:e9784. doi: 10.7717/peerj.9784 (PMC7457929; doi:10.7717/peerj.9784)
Supplement: Table S5 [file peerj-08-9784-s005.xlsx]

## Sheet: Sheet1
Supplementary Table 5 The numbers of amino acid and introns position in TgGATAs and their homologs in ascomycota.
Species	GATA1	Number of amino acid	exon sequences	intron position in aa	Number of bases in intron
Tolypocladium guangdongense	CCG_01872	1034	1-2816, 2817-3105	939	64
Tolypocladium ophioglossoides	KND90894	1055	1-2835, 2836-3168	945	64
Tolypocladium paradoxum	POR35108	933	1-378, 379-2802	126	64
Ophiocordyceps sinensis	EQK98623	1105	1-2961, 2962-3318	987	71
Fusarium fujikuroi	XP_023429557	1024	1-2664, 2665-3075	888	53
Fusarium oxysporum	RKK86314	1024	1-2733, 2734-3075	911	55
Cordyceps militaris	XP_006666400	963	1-2559, 2560-2892	853	59
Neurospora crassa	XP_011395153	1167	1-2898, 2899-3504	996	67
Magnaporthe oryzae	XP_003716379	1101	1-2979, 2980-3306	993	101
Botrytis cinerea	XP_024547291	1143	1-2928, 2929-3432	976	351
Sclerotinia sclerotiorum	XP_001586924	941	1-2826	no	0
Aspergillus nidulans	XP_661040	836	1-573, 574-657, 658-1089, 1090-2511	191, 219, 363	167
Aspergillus niger	XP_001395039	871	1-777, 778-873, 1311	259, 291, 437	230
Species	GATA2	Number of amino acid	exon sequences	intron position in aa	Number of bases in intron
Tolypocladium guangdongense	CCG_04254	541	1-169, 170-1487, 1488-1626	56, 495	1215
Tolypocladium ophioglossoides	KND91220	474	1-140, 141-1425	46	62
Tolypocladium paradoxum	POR34486	476	1-1285, 1286-1431	428	59
Ophiocordyceps sinensis	EQK98372	476	1-152, 153-1431	50	66
Fusarium fujikuroi	XP_023424953	485	1-123, 124-1318,1319-1458	41, 439	191
Fusarium oxysporum	XP_018233539	444	1-1194, 1195-1335	398	55
Cordyceps militaris	XP_006665295	503	1-1354, 1355-1512	451	68
Neurospora crassa	XP_963819	530	1-144, 145-1414, 1414-1593	48, 471	243
Magnaporthe oryzae	XP_003713571	556	1-93, 94-1510, 1511-1671	31, 503	327
Botrytis cinerea	XP_001559684	509	1-123, 124-1372, 1373-1530	41, 457	193
Sclerotinia sclerotiorum	XP_001587208	496	1-120, 121-1357, 1358-1491	40, 452
Aspergillus nidulans	XP_661039	366	1-574, 575-657, 658-1101	191, 219	115
Aspergillus niger	XP_001389246	473	1-1206, 1207-1375, 1376-1422	402, 458	135
Species	GATA3	Number of amino acid	exon sequences	intron position in aa	Number of bases in intron
Tolypocladium guangdongense	CCG_07987	979	1-514, 515-894, 895-2940	171, 298	312
Tolypocladium paradoxum	POR38421	967	1-521, 522-858, 859-2904	173, 286	332
Fusarium fujikuroi	XP_023432271	953	1-464, 465-813, 814-2862	154, 271	240
Fusarium oxysporum	XP_018237085	975	1-509, 510-858, 859-2928	169, 286	240
Cordyceps militaris	XP_006668813	857	1-416, 417-735, 736-2574	138, 245	420
Neurospora crassa	XP_963796	1036	1-626, 623-1005, 1006-3111	208, 335	177
Magnaporthe oryzae	XP_003720998	956	1-377, 378-741, 742-2871	125, 247	304
Botrytis cinerea	XP_001551685	989	1-530, 531-891, 892-2970	176, 297	147
Sclerotinia sclerotiorum	XP_001593613	901	1-527, 528-891, 892-1456, 1457-2707	175, 297, 485	428
Aspergillus niger	XP_001395948	846	1-449, 450-1984, 1985-2001, 2002-2541	149, 661, 667	192
Species	GATA4	Number of amino acid	exon sequences	intron position in aa	Number of bases in intron
Tolypocladium guangdongense	CCG_02574	376	1-147, 148-218, 219-413, 414-1131	49, 72, 137	690
Tolypocladium ophioglossoides	KND88796	348	1-729, 730-924, 925-997, 998-1155	243, 308, 332	695
Tolypocladium paradoxum	POR36303	378	1-251, 252-324, 325-519, 520-1137	83, 108, 173	795
Fusarium fujikuroi	XP_023425875	507	1-164, 165-243, 244-438, 439-1524	54, 81, 146	615
Fusarium oxysporum	XP_018237089	801	1-336, 337-2406	112	149
Cordyceps militaris	XP_006669921	311	1-222, 223-936	74	71
Neurospora crassa	XP_011394349	532	1-272, 273-357, 358-552, 553-1599	90, 119, 184	775
Magnaporthe oryzae	XP_003711901	512	1-227, 228-552, 553-747, 748-1539	75, 184, 249	418
Botrytis cinerea	XP_001545710	372	1-182, 183-270, 271-465, 466-1119	60, 90, 155	887
Sclerotinia sclerotiorum	XP_001589151	358	1-140, 141-228, 229-423, 424-1077	46, 76, 141	810
Aspergillus niger	XP_001399365	316	1-231, 232-951	77	96
Species	GATA5	Number of amino acid	exon sequences	intron position in aa	Number of bases in intron
Tolypocladium guangdongense	CCG_07433	535	1-229, 230-776,777-1608	76, 258	112
Tolypocladium ophioglossoides	KND87860	571	1-851, 852-1394, 1395-1716	283, 464	119
Tolypocladium paradoxum	POR39347	569	1-314, 315-859, 860-1710	104, 286	110
Ophiocordyceps sinensis	EQK99369	465	1-230, 231-772, 773-1067, 1068-1398	76, 257, 355	323
Fusarium fujikuroi	XP_023426432	555	1-308, 309-844, 845-1668	102, 281	118
Fusarium oxysporum	XP_018242016	555	1-308, 309-844, 845-1668	102, 281	108
Cordyceps militaris	XP_006669356	533	1-263, 264-799, 780-1602	87, 266	117
Neurospora crassa	XP_961978	587	1-356, 357-919, 920-1764	118, 306	125
Magnaporthe oryzae	XP_003714860	539	1-344, 345-874, 875-1620	114, 291	124
Botrytis cinerea	XP_001546599	625	1-422, 423-970, 971-1878	140, 323	98
Sclerotinia sclerotiorum	XP_001590783	749	1-350, 351-898, 899-1778, 1779-1998, 1999-2250	116, 299, 592, 662	657
Aspergillus nidulans	XP_657780	549	1-320, 321-826, 827-1650	106, 275	115
Aspergillus niger	XP_001388675	569	1-335, 336-874, 875-1710	111, 291	671
