# Supplementary material for: Distribution, evolution and expression of GATA-TFs provide new insights into their functions in light response and fruiting body development of Tolypocladium guangdongense
Source: PeerJ. 2020 Aug 28;8:e9784. doi: 10.7717/peerj.9784 (PMC7457929; doi:10.7717/peerj.9784)
Supplement: Table S6 [file peerj-08-9784-s006.xlsx]

## Sheet: Sheet1
Supplementary Table 6 List of the identiﬁed motif and their characteristics identified by MEME.
Motif	Sequences	Characteristics
motif 1	APPRRCANCGTSNTPEWRRGPS	Zinc finger, GATA-type
motif 2	GARTLCNACGLRYAKQTRKR	Zinc finger, GATA-type
motif 3	KIHLGAVDMSCAFVVCDVTMNDCPIIYVSDNFQNLTGYSRHEIVGQNCRF	PAS domain
motif 4	WDKMLLENTDDVIHVLSLKGLFLYLSPSCKRVLEYDASELVGNSLSSICH	PAS domain superfamily
motif 5	KDATAGNQVNIVFRIRRKQSGYTWFESHGSLFVEQGKGRKCIILVGRKRP	uncharacterized motifs
motif 6	LCNACGLFLKVSGNVRPLLLK	Zinc finger, NHR/GATA-type
motif 7	NLKKMIHEGREVQQSLINYRKGGKPFLNLLTMIPIPWDTDD	uncharacterized motif
motif 8	DNIFDELRTTKCSSWQFELRQMEKVNRILAEELGGLLSNKKKRKRRKGVG	uncharacterized motif
motif 9	GTSIQELMRKESRPEFGRTIEKARRGKIVSCKHEVQNRRGQGLQAQTTLY	uncharacterized motif
motif 10	NYKHSDIGQYIWTPPSSSQWEPDNGQTLGVDDVSTLLQQFNPKGJVSDWH	uncharacterized motif
