# Supplementary material for: Distribution, evolution and expression of GATA-TFs provide new insights into their functions in light response and fruiting body development of Tolypocladium guangdongense
Source: PeerJ. 2020 Aug 28;8:e9784. doi: 10.7717/peerj.9784 (PMC7457929; doi:10.7717/peerj.9784)
Supplement: Table S7 [file peerj-08-9784-s007.xlsx]

## Sheet: Sheet1
Supplementary Table 7 List of the predicted cis-elements and their functions.
gene ID	cis-elements	Position	sequence	function
CCG_01872	Box 4	706	ATTAAT	part of a conserved DNA module involved in light responsiveness
	G-box	346	CACGAC	cis-acting regulatory element involved in light responsiveness
	Sp1	501	GGGCGG	light responsive element
	TCT-motif	1472	TCTTAC	part of a light responsive element
	circadian	1157	CAAAGATATC	cis-acting regulatory element involved in circadian control
	LTR	664	CCGAAA	cis-acting element involved in low-temperature responsiveness
	TC-rich repeats	1468	GTTTTCTTAC	cis-acting element involved in defense and stress responsiveness
CCG_04254	G-box	353	CACGAC	cis-acting regulatory element involved in light responsiveness
	Sp1	1422	GGGCGG	light responsive element
CCG_06499	G-box	1426	CACGTT	cis-acting regulatory element involved in light responsiveness
	G-box	1	CACGTC	cis-acting regulatory element involved in light responsiveness
	G-box	1248	CACGAC	cis-acting regulatory element involved in light responsiveness
	G-box	246	CACGAC	cis-acting regulatory element involved in light responsiveness
	G-box	1101	CACGAC	cis-acting regulatory element involved in light responsiveness
	MBS	649	CAACTG	MYB binding site involved in drought-inducibility
CCG_07987	G-box	363	CACGTC	cis-acting regulatory element involved in light responsiveness
	G-box	1108	CACGTC	cis-acting regulatory element involved in light responsiveness
	Sp1	104	GGGCGG	light responsive element
	Sp1	684	GGGCGG	light responsive element
	TCCC-motif	647	TCTCCCT	part of a light responsive element
CCG_02574	G-box	477	CACGTG	cis-acting regulatory element involved in light responsiveness
	G-box	365	GCCACGTGGA	cis-acting regulatory element involved in light responsiveness
	G-box	1249	CACGTC	cis-acting regulatory element involved in light responsiveness
	Sp1	39	GGGCGG	light responsive element
	Sp1	43	GGGCGG	light responsive element
CCG_07433	GATA-motif	480	AAGATAAGATT	part of a light responsive element
	Sp1	374	GGGCGG	light responsive element
CCG_00651	G-box	199	CACGAC	cis-acting regulatory element involved in light responsiveness
	G-box	958	TAACACGTAG	cis-acting regulatory element involved in light responsiveness
