# Supplementary material for: Distribution, evolution and expression of GATA-TFs provide new insights into their functions in light response and fruiting body development of Tolypocladium guangdongense
Source: PeerJ. 2020 Aug 28;8:e9784. doi: 10.7717/peerj.9784 (PMC7457929; doi:10.7717/peerj.9784)
Supplement: Table S8 [file peerj-08-9784-s008.xlsx]

## Sheet: Sheet1
Supplementary Table 8 Stability analysis of eight candidate reference genes for qPCR analysis in Tolypocladium guangdongensis under different light conditions calculated by the GeNorm and NormFinder analysis, respectively.
			Candidate references
	vps	H4	rpb	β-tub1	α-tub2	actin	α-tub1	EF1-β
GeNorm analysis
M value	1.201	2.339	1.319	0.963	1.774	1.009	0.954	1.113
NormFinder analysis
Stability value	0.556	1.557	0.57	0.076	1.119	0.158	0.087	0.38
