# Supplementary material for: Distribution, evolution and expression of GATA-TFs provide new insights into their functions in light response and fruiting body development of Tolypocladium guangdongense
Source: PeerJ. 2020 Aug 28;8:e9784. doi: 10.7717/peerj.9784 (PMC7457929; doi:10.7717/peerj.9784)
Supplement: Table S9 [file peerj-08-9784-s009.xlsx]

## Sheet: Sheet1
Supplementary Table 9 Pairwise Pearson correlation coefficients of TgGATAs analyzed by WGCNA according to the previous RNA-seq data.
Var1	Var2	cor	p_value
CCG_06499	CCG_00651	0.499932	0.0128597
CCG_06499	CCG_01872	0.653969	0.000527972
CCG_06499	CCG_02574	-0.259567	0.220629
CCG_06499	CCG_04254	0.578648	0.0030535
CCG_06499	CCG_07433	0.21763	0.306989
CCG_06499	CCG_07987	-0.212143	0.319642
CCG_07433	CCG_00651	-0.280242	0.184716
CCG_07433	CCG_01872	-0.194201	0.363193
CCG_07433	CCG_02574	-0.681943	0.000242447
CCG_07433	CCG_04254	-0.23937	0.259937
CCG_07433	CCG_07987	0.258148	0.223253
CCG_07987	CCG_00651	-0.313347	0.135968
CCG_07987	CCG_01872	-0.422622	0.0396448
CCG_07987	CCG_02574	-0.00971359	0.96407
CCG_07987	CCG_04254	-0.534812	0.00708949
CCG_04254	CCG_00651	0.820089	9.33589e-07
CCG_04254	CCG_01872	0.882857	1.13182e-08
CCG_04254	CCG_02574	-0.216626	0.309281
CCG_02574	CCG_00651	-0.110595	0.60693
CCG_02574	CCG_01872	-0.172463	0.420326
CCG_00651	CCG_01872	0.757527	1.8156e-05
